# Supplementary material
Source: PubMed Central journal article supplement (PMC7599073)
Supplement: NIHMS1637405-supplement-1.pdf [file NIHMS1637405-supplement-1.pdf]

|                        |                                                                                                                                                                                                                               |
|------------------------|-------------------------------------------------------------------------------------------------------------------------------------------------------------------------------------------------------------------------------|
| Cytomix buffer         | 25 mM HEPES, pH 7.6, 120 mM KCl, 10 mM K <sub>2</sub> HPO <sub>4</sub> /KH <sub>2</sub> PO <sub>4</sub> , 5 mM MgCl <sub>2</sub> , 0.015 mM CaCl <sub>2</sub> , and 2 mM EGTA.                                                |
| D10 medium             | DMEM 1X (Corning, Cat #: 10-013-CV), 10 mM HEPES, 10% (v/v) Cosmic Calf Serum (Hyclone, Cat #: SH30087.03), 1 mM sodium pyruvate, 4 mM L-glutamine, 100 units/mL of penicillin, and 100 µg/mL of streptomycin.                |
| Phenol red-free medium | DMEM/ Highly Modified (Hyclone, Cat #: SH30284.02), 10 mM HEPES, 10% (v/v) Cosmic Calf Serum (Hyclone, Cat #: SH30087.03), 1 mM sodium pyruvate, 4 mM L-glutamine, 100 units/mL of penicillin, and 100 µg/mL of streptomycin. |
| 2X NLuc Buffer         | 100 mM MES, pH 6.0, 1mM CDTA, 0.5% Tergitol, 0.05% Mazu DF 204, 150 mM KCl, 1 mM DTT, 35 mM Thiourea.                                                                                                                         |

**Supplementary Table 1: Recipes for buffers.**
